# Supplementary material
Source: Springer Nature journal article supplement (https://www.springermedizin.de/resource/supplementary/12885_2014_5198_MOESM2_ESM.pdf/9468570)
Supplement: MOESM2 [file 9468570]

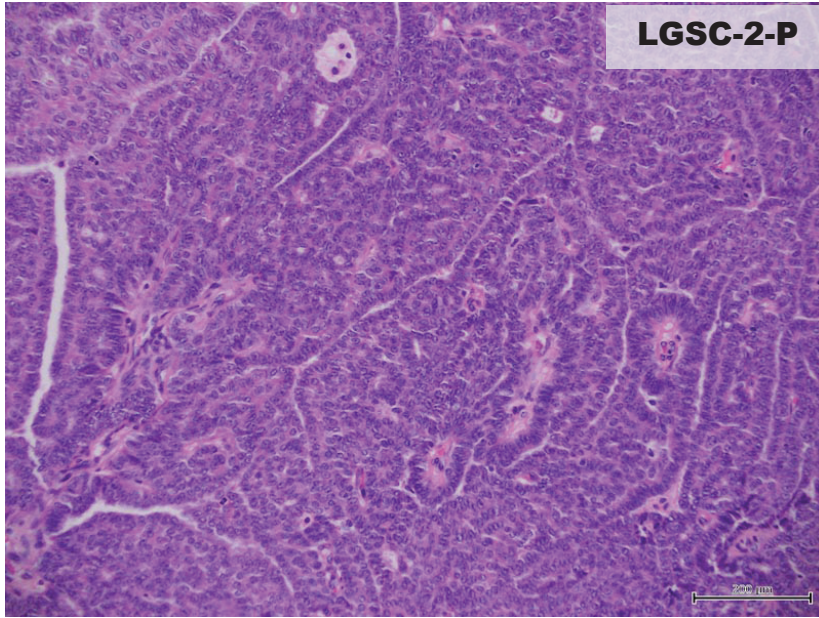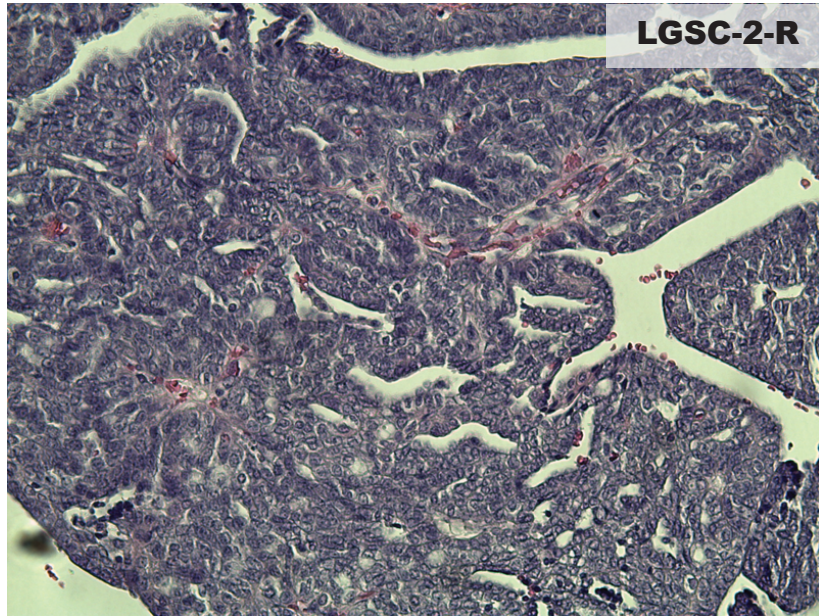

**Additional File 4. LGSC-2 Case Images.**
